# Supplementary material
Source: MDPI journal article supplement (https://www.mdpi.com/2073-4395/13/11/2761)
Supplement: s1 [file s1]

## Supplementary

**Supplementary Table S1:** List of the wild *Vigna* accessions used in this study and their region of provenance

| Accessions number | Regions  | Species                                 |
|-------------------|----------|-----------------------------------------|
| 1                 | Thiès    | <i>Vigna unguiculata</i> var. spontanea |
| 2                 | Thiès    | <i>Vigna unguiculata</i> var. spontanea |
| 3                 | Thiès    | <i>Vigna unguiculata</i> var. spontanea |
| 5                 | Thiès    | <i>Vigna unguiculata</i> var. spontanea |
| 6                 | Thiès    | <i>Vigna unguiculata</i> var. spontanea |
| 7                 | Thiès    | <i>Vigna unguiculata</i> var. spontanea |
| 8                 | Thiès    | <i>Vigna unguiculata</i> var. spontanea |
| 9                 | Thiès    | <i>Vigna unguiculata</i> var. spontanea |
| 10                | Thiès    | <i>Vigna unguiculata</i> var. spontanea |
| 11                | Thiès    | <i>Vigna unguiculata</i> var. spontanea |
| 12                | Thiès    | <i>Vigna unguiculata</i> var. spontanea |
| 13                | Thiès    | <i>Vigna unguiculata</i> var. spontanea |
| 14                | Thiès    | <i>Vigna radiata</i>                    |
| 15                | Thiès    | <i>Vigna unguiculata</i> var. spontanea |
| 16                | Thiès    | <i>Vigna unguiculata</i> var. spontanea |
| 17                | Thiès    | <i>Vigna unguiculata</i> var. spontanea |
| 18                | Thiès    | <i>Vigna unguiculata</i> var. spontanea |
| 19                | Thiès    | <i>Vigna unguiculata</i> var. spontanea |
| 22                | Diourbel | <i>Vigna unguiculata</i> var. spontanea |
| 26                | Thiès    | <i>Vigna unguiculata</i> var. spontanea |
| 27                | Thiès    | <i>Vigna unguiculata</i> var. spontanea |
| 28                | Thiès    | <i>Vigna unguiculata</i> var. spontanea |
| 29                | Thiès    | <i>Vigna unguiculata</i> var. spontanea |
| 47                | Fatick   | <i>Vigna unguiculata</i> var. spontanea |
| 48                | Fatick   | <i>Vigna unguiculata</i> var. spontanea |
| 49                | Fatick   | <i>Vigna unguiculata</i> var. spontanea |
| 50                | Fatick   | <i>Vigna unguiculata</i> var. spontanea |
| 51                | Fatick   | <i>Vigna unguiculata</i> var. spontanea |
| 52                | Fatick   | <i>Vigna unguiculata</i> var. spontanea |

**Supplementary Table S1:** List of the wild *Vigna* accessions used in this study and their region of provenance (continued)

| Accessions number | Regions | Species                                 |
|-------------------|---------|-----------------------------------------|
| 53                | Fatick  | <i>Vigna unguiculata</i> var. spontanea |
| 54                | Fatick  | <i>Vigna unguiculata</i> var. spontanea |
| 55                | Fatick  | <i>Vigna unguiculata</i> var. spontanea |
| 56                | Fatick  | <i>Vigna unguiculata</i> var. spontanea |
| 58                | Fatick  | <i>Vigna unguiculata</i> var. spontanea |
| 59                | Fatick  | <i>Vigna unguiculata</i> var. spontanea |
| 60                | Fatick  | <i>Vigna unguiculata</i> var. spontanea |
| 61                | Fatick  | <i>Vigna unguiculata</i> var. spontanea |
| 66                | Fatick  | <i>Vigna unguiculata</i> var. spontanea |
| 67                | Fatick  | <i>Vigna unguiculata</i> var. spontanea |
| 68                | Fatick  | <i>Vigna unguiculata</i> var. spontanea |
| 69                | Fatick  | <i>Vigna unguiculata</i> var. spontanea |
| 71                | Fatick  | <i>Vigna unguiculata</i> var. spontanea |
| 72                | Fatick  | <i>Vigna unguiculata</i> var. spontanea |
| 75                | Kolda   | <i>Vigna racemosa</i>                   |
| 77                | Kolda   | Unidentified accession                  |
| 79                | Kolda   | <i>Vigna racemosa</i>                   |
| 81                | Sédhiou | <i>Vigna racemosa</i>                   |
| 82                | Sédhiou | <i>Vigna unguiculata</i> var. spontanea |
| 84                | Sédhiou | <i>Vigna racemosa</i>                   |
| 88                | Kolda   | <i>Vigna racemosa</i>                   |
| 90                | Kolda   | <i>Vigna unguiculata</i> (hybrid)       |
| 92                | Kolda   | <i>Vigna racemosa</i>                   |
| 93                | Kolda   | <i>Vigna racemosa</i>                   |
| 94                | Kolda   | <i>Vigna racemosa</i>                   |
| 95                | Kolda   | <i>Vigna racemosa</i>                   |

**Supplementary Table S2:** Agro-morphological characteristics of 55 wild *Vigna* accessions

| Accession<br>Number | Species                              | Leaf color         | Terminal<br>leaflet shape | Hypocotyl<br>color | Growth<br>habit | Plant hairi-<br>ness | Plant pigmen-<br>tation | Flower<br>color | Leaf<br>texture | Seed shape | Pod<br>Dehiscence | Eye color of the<br>seed | Texture of<br>the seeds |
|---------------------|--------------------------------------|--------------------|---------------------------|--------------------|-----------------|----------------------|-------------------------|-----------------|-----------------|------------|-------------------|--------------------------|-------------------------|
| 1                   | <i>V. unguiculata</i> var. spontanea | Dark green         | Globose                   | Green              | Climbing        | Glabrous             | Presence                | Violet          | Cariaceous      | Rhomboid   | Dehiscent         | White                    | Rough                   |
| 2                   | <i>V. unguiculata</i> var. spontanea | Dark green         | Globose                   | Green              | Climbing        | Glabrous             | Presence                | Violet          | Cariaceous      | Rhomboid   | Dehiscent         | White                    | Rough                   |
| 3                   | <i>V. unguiculata</i> var. spontanea | Dark green         | Globose                   | Green              | Climbing        | Glabrous             | Presence                | Violet          | Cariaceous      | Rhomboid   | Dehiscent         | White                    | Rough                   |
| 5                   | <i>V. unguiculata</i> var. spontanea | Dark green         | Globose                   | Green              | Climbing        | Glabrous             | Presence                | Violet          | Cariaceous      | Rhomboid   | Dehiscent         | White                    | Rough                   |
| 6                   | <i>V. unguiculata</i> var. spontanea | Dark green         | Globose                   | Green              | Climbing        | Glabrous             | Presence                | Violet          | Cariaceous      | Rhomboid   | Dehiscent         | White                    | Rough                   |
| 7                   | <i>V. unguiculata</i> var. spontanea | Dark green         | Hastate                   | Green              | Climbing        | Glabrous             | Presence                | Violet          | Cariaceous      | Rhomboid   | Dehiscent         | White                    | Rough                   |
| 8                   | <i>V. unguiculata</i> var. spontanea | Dark green         | Globose                   | Green              | Climbing        | Glabrous             | Presence                | Violet          | Cariaceous      | Rhomboid   | Dehiscent         | White                    | Rough                   |
| 9                   | <i>V. unguiculata</i> var. spontanea | Dark green         | Globose                   | Green              | Climbing        | Glabrous             | Presence                | Violet          | Cariaceous      | Rhomboid   | Dehiscent         | White                    | Rough                   |
| 10                  | <i>V. unguiculata</i> var. spontanea | Dark green         | Globose                   | Green              | Climbing        | Glabrous             | Presence                | Violet          | Cariaceous      | Rhomboid   | Dehiscent         | White                    | Rough                   |
| 11                  | <i>V. unguiculata</i> var. spontanea | Dark green         | Globose                   | Green              | Climbing        | Glabrous             | Presence                | Violet          | Cariaceous      | Rhomboid   | Dehiscent         | White                    | Rough                   |
| 12                  | <i>V. unguiculata</i> var. spontanea | Dark green         | Globose                   | Green              | Climbing        | Glabrous             | Presence                | Violet          | Cariaceous      | Rhomboid   | Dehiscent         | White                    | Rough                   |
| 13                  | <i>V. unguiculata</i> var. spontanea | Dark green         | Globose                   | Green              | Climbing        | Glabrous             | Presence                | Violet          | Cariaceous      | Rhomboid   | Dehiscent         | White                    | Rough                   |
| 14                  | <i>V. radiata</i>                    | Intermediate green | Deltoide                  | Green              | Climbing        | Pubescent            | Presence                | Yellow          | Cariaceous      | Globuleuse | Dehiscent         | White                    | Smooth                  |
| 15                  | <i>V. unguiculata</i> var. spontanea | Dark green         | Sub-hastate               | Green              | Climbing        | Glabrous             | Presence                | Violet          | Cariaceous      | Rhomboid   | Dehiscent         | White                    | Rough                   |
| 16                  | <i>V. unguiculata</i> var. spontanea | Dark green         | Sub-hastate               | Green              | Climbing        | Glabrous             | Presence                | Violet          | Cariaceous      | Rhomboid   | Dehiscent         | White                    | Rough                   |
| 17                  | <i>V. unguiculata</i> var. spontanea | Dark green         | Hastate                   | Green              | Climbing        | Glabrous             | Presence                | Violet          | Cariaceous      | Rhomboid   | Dehiscent         | White                    | Rough                   |
| 18                  | <i>V. unguiculata</i> var. spontanea | Dark green         | Sub-hastate               | Green              | Climbing        | Glabrous             | Presence                | Violet          | Cariaceous      | Rhomboid   | Dehiscent         | White                    | Rough                   |
| 19                  | <i>V. unguiculata</i> var. spontanea | Dark green         | Sub-globose               | Green              | Climbing        | Glabrous             | Presence                | Violet          | Cariaceous      | Rhomboid   | Dehiscent         | White                    | Rough                   |
| 22                  | <i>V. unguiculata</i> var. spontanea | Dark green         | Sub-hastate               | Green              | Climbing        | Glabrous             | Presence                | Violet          | Cariaceous      | Rhomboid   | Dehiscent         | White                    | Rough                   |
| 26                  | <i>V. unguiculata</i> var. spontanea | Dark green         | Sub-globose               | Green              | Climbing        | Glabrous             | Presence                | Violet          | Cariaceous      | Rhomboid   | Dehiscent         | White                    | Rough                   |
| 27                  | <i>V. unguiculata</i> var. spontanea | Dark green         | Sub-hastate               | Green              | Climbing        | Glabrous             | Presence                | Violet          | Cariaceous      | Rhomboid   | Dehiscent         | White                    | Rough                   |
| 28                  | <i>V. unguiculata</i> var. spontanea | Dark green         | Sub-hastate               | Green              | Climbing        | Glabrous             | Presence                | Violet          | Cariaceous      | Rhomboid   | Dehiscent         | White                    | Rough                   |
| 29                  | <i>V. unguiculata</i> var. spontanea | Dark green         | Sub-hastate               | Green              | Climbing        | Glabrous             | Presence                | Violet          | Cariaceous      | Rhomboid   | Dehiscent         | White                    | Rough                   |

**Supplementary Table S2:** Agro-morphological characteristics of 55 wild *Vigna* accessions (continued)

| Accession Number | Species                              | Leaf color         | Terminal leaflet shape | Hypocotyl color | Growth habit | Plant hairiness | Plant pigmentation | Flower color | Leaf texture | Seed shape  | Pod Dehiscence | Eye color of the seed | Texture of the seeds |
|------------------|--------------------------------------|--------------------|------------------------|-----------------|--------------|-----------------|--------------------|--------------|--------------|-------------|----------------|-----------------------|----------------------|
| 47               | <i>V. unguiculata</i> var. spontanea | Dark green         | Sub-globose            | Green           | Climbing     | Glabrous        | Presence           | Violet       | Cariaceous   | Rhomboid    | Dehiscent      | White                 | Rough                |
| 48               | <i>V. unguiculata</i> var. spontanea | Dark green         | Sub-globose            | Green           | Climbing     | Glabrous        | Presence           | Violet       | Cariaceous   | Rhomboid    | Dehiscent      | White                 | Rough                |
| 49               | <i>V. unguiculata</i> var. spontanea | Dark green         | Sub-globose            | Green           | Climbing     | Glabrous        | Presence           | Violet       | Cariaceous   | Rhomboid    | Dehiscent      | White                 | Rough                |
| 50               | <i>V. unguiculata</i> var. spontanea | Dark green         | Sub-globose            | Green           | Climbing     | Glabrous        | Presence           | Violet       | Cariaceous   | Rhomboid    | Dehiscent      | White                 | Rough                |
| 51               | <i>V. unguiculata</i> var. spontanea | Dark green         | Sub-globose            | Green           | Climbing     | Glabrous        | Presence           | Violet       | Cariaceous   | Rhomboid    | Dehiscent      | White                 | Rough                |
| 52               | <i>V. unguiculata</i> var. spontanea | Dark green         | Hastate                | Green           | Climbing     | Glabrous        | Presence           | Violet       | Cariaceous   | Rhomboid    | Dehiscent      | White                 | Rough                |
| 53               | <i>V. unguiculata</i> var. spontanea | Dark green         | Hastate                | Green           | Climbing     | Glabrous        | Presence           | Violet       | Cariaceous   | Rhomboid    | Dehiscent      | White                 | Rough                |
| 54               | <i>V. unguiculata</i> var. spontanea | Dark green         | Hastate                | Green           | Climbing     | Glabrous        | Presence           | Violet       | Cariaceous   | Rhomboid    | Dehiscent      | White                 | Rough                |
| 55               | <i>V. unguiculata</i> var. spontanea | Dark green         | Hastate                | Green           | Climbing     | Glabrous        | Presence           | Violet       | Cariaceous   | Rhomboid    | Dehiscent      | White                 | Rough                |
| 56               | <i>V. unguiculata</i> var. spontanea | Dark green         | Lanceolate             | Green           | Climbing     | Glabrous        | Presence           | Violet       | Cariaceous   | Rhomboid    | Dehiscent      | White                 | Rough                |
| 58               | <i>V. unguiculata</i> var. spontanea | Dark green         | Lanceolate             | Green           | Climbing     | Glabrous        | Presence           | Violet       | Cariaceous   | Rhomboid    | Dehiscent      | White                 | Rough                |
| 59               | <i>V. unguiculata</i> var. spontanea | Dark green         | Lanceolate             | Green           | Climbing     | Glabrous        | Presence           | Violet       | Cariaceous   | Rhomboid    | Dehiscent      | White                 | Rough                |
| 60               | <i>V. unguiculata</i> var. spontanea | Dark green         | Hastate                | Green           | Climbing     | Glabrous        | Presence           | Violet       | Cariaceous   | Rhomboid    | Dehiscent      | White                 | Rough                |
| 61               | <i>V. unguiculata</i> var. spontanea | Dark green         | Hastate                | Green           | Climbing     | Glabrous        | Presence           | Violet       | Cariaceous   | Rhomboid    | Dehiscent      | White                 | Rough                |
| 66               | <i>V. unguiculata</i> var. spontanea | Dark green         | Hastate                | Green           | Climbing     | Glabrous        | Presence           | Violet       | Cariaceous   | Rhomboid    | Dehiscent      | White                 | Rough                |
| 67               | <i>V. unguiculata</i> var. spontanea | Dark green         | Hastate                | Green           | Climbing     | Glabrous        | Presence           | Violet       | Cariaceous   | Rhomboid    | Dehiscent      | White                 | Rough                |
| 68               | <i>V. unguiculata</i> var. spontanea | Dark green         | Sub-hastate            | Green           | Climbing     | Glabrous        | Presence           | Violet       | Cariaceous   | Rhomboid    | Dehiscent      | White                 | Rough                |
| 69               | <i>V. unguiculata</i> var. spontanea | Dark green         | Sub-hastate            | Green           | Climbing     | Glabrous        | Presence           | Violet       | Cariaceous   | Rhomboid    | Dehiscent      | White                 | Rough                |
| 71               | <i>V. unguiculata</i> var. spontanea | Dark green         | Sub-hastate            | Green           | Climbing     | Glabrous        | Presence           | Violet       | Cariaceous   | Rhomboid    | Dehiscent      | White                 | Rough                |
| 72               | <i>V. unguiculata</i> var. spontanea | Dark green         | Sub-hastate            | Green           | Climbing     | Glabrous        | Presence           | Violet       | Cariaceous   | Rhomboid    | Dehiscent      | White                 | Rough                |
| 75               | <i>V. racemosa</i>                   | Intermediate green | Oval                   | Purple          | Climbing     | Pubescent       | Absence            | Dark blue    | Membranous   | Rhomboid    | Dehiscent      | White                 | Smooth               |
| 77               | Unidentified accession               | Pale green         | Elliptical             | Purple          | Climbing     | Pubescent       | Absence            | Yellow       | Membranous   | Cylindrical | Not Dehiscent  | Black                 | Rough                |

**Supplementary Table S2:** Agro-morphological characteristics of 55 wild *Vigna* accessions (continued)

| Accession |                                      |                    | Terminal      | Hypocotyl | Growth   | Plant hairi- | Plant pigmen- | Flower    | Leaf       |            | Pod        | Eye color of the | Texture of |
|-----------|--------------------------------------|--------------------|---------------|-----------|----------|--------------|---------------|-----------|------------|------------|------------|------------------|------------|
| Number    | Species                              | Leaf color         | leaflet shape | color     | habit    | ness         | tation        | color     | texture    | Seed shape | Dehiscence | seed             | the seeds  |
| 79        | <i>V. racemosa</i>                   | Intermediate green | Oval          | Purple    | Climbing | Pubescent    | Absence       | Dark blue | Membranous | Rhomboid   | Dehiscent  | White            | Smooth     |
| 81        | <i>V. racemosa</i>                   | Intermediate green | Oval          | Purple    | Climbing | Pubescent    | Absence       | Dark blue | Membranous | Rhomboid   | Dehiscent  | White            | Smooth     |
| 82        | <i>V. unguiculata</i> var. spontanea | Dark green         | Sub-hastate   | Green     | Climbing | Glabrous     | Presence      | Violet    | Cariaceous | Rhomboid   | Dehiscent  | White            | Rough      |
| 84        | <i>V. racemosa</i>                   | Intermediate green | Oval          | Purple    | Climbing | Pubescent    | Absence       | Dark blue | Membranous | Rhomboid   | Dehiscent  | White            | Smooth     |
| 88        | <i>V. racemosa</i>                   | Intermediate green | Oval          | Purple    | Climbing | Pubescent    | Absence       | Dark blue | Membranous | Rhomboid   | Dehiscent  | White            | Smooth     |
| 90        | <i>V. unguiculata</i> (hybrid)       | Dark green         | Sub-globose   | Green     | Climbing | Glabrous     | Presence      | Violet    | Cariaceous | Rhomboid   | Dehiscent  | White            | Rough      |
| 92        | <i>V. racemosa</i>                   | Intermediate green | Oval          | Purple    | Climbing | Pubescent    | Absence       | Dark blue | Membranous | Rhomboid   | Dehiscent  | White            | Smooth     |
| 93        | <i>V. racemosa</i>                   | Intermediate green | Oval          | Purple    | Climbing | Pubescent    | Absence       | Dark blue | Membranous | Rhomboid   | Dehiscent  | White            | Smooth     |
| 94        | <i>V. racemosa</i>                   | Intermediate green | Oval          | Purple    | Climbing | Pubescent    | Absence       | Dark blue | Membranous | Rhomboid   | Dehiscent  | White            | Smooth     |
| 95        | <i>V. racemosa</i>                   | Intermediate green | Oval          | Purple    | Climbing | Pubescent    | Absence       | Dark blue | Membranous | Rhomboid   | Dehiscent  | White            | Smooth     |
